# Supplementary material for: Comparative Transcriptome Analysis for Understanding Predator-Induced Polyphenism in the Water Flea Daphnia pulex
Source: MDPI journal article supplement (doi:10.3390/ijms19072110), 2018-07-20
Supplement: s1 [file s1]

## Supplementary Materials

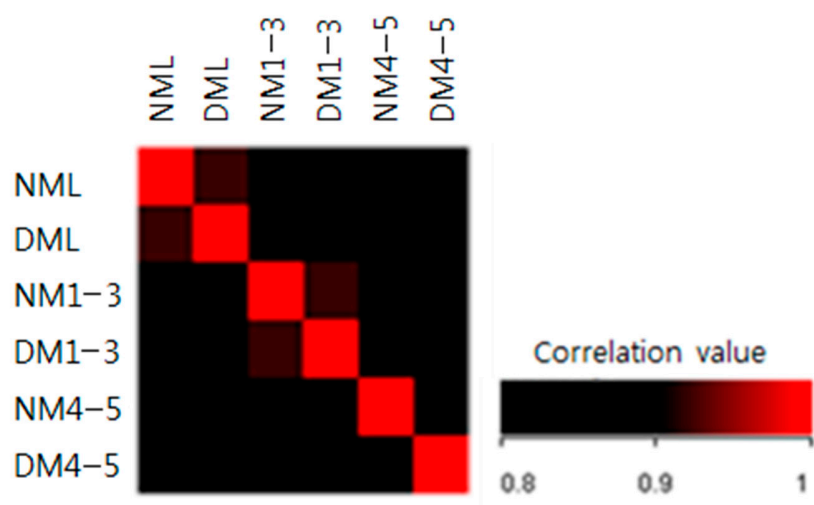

**Figure S1.** Pairwise correlation of the six libraries; NML (normal morph of late embryo), DML (defensive morph of late embryo), NM1-3 (normal morph of 1-3 instar), DM1-3 (defensive morph of 1-3 instar), NM4-5 (normal morph of 4-5 instar), and DM4-5 (defensive morph of 4-5 instar). Color changes from black to red mean correlation values from low to high.

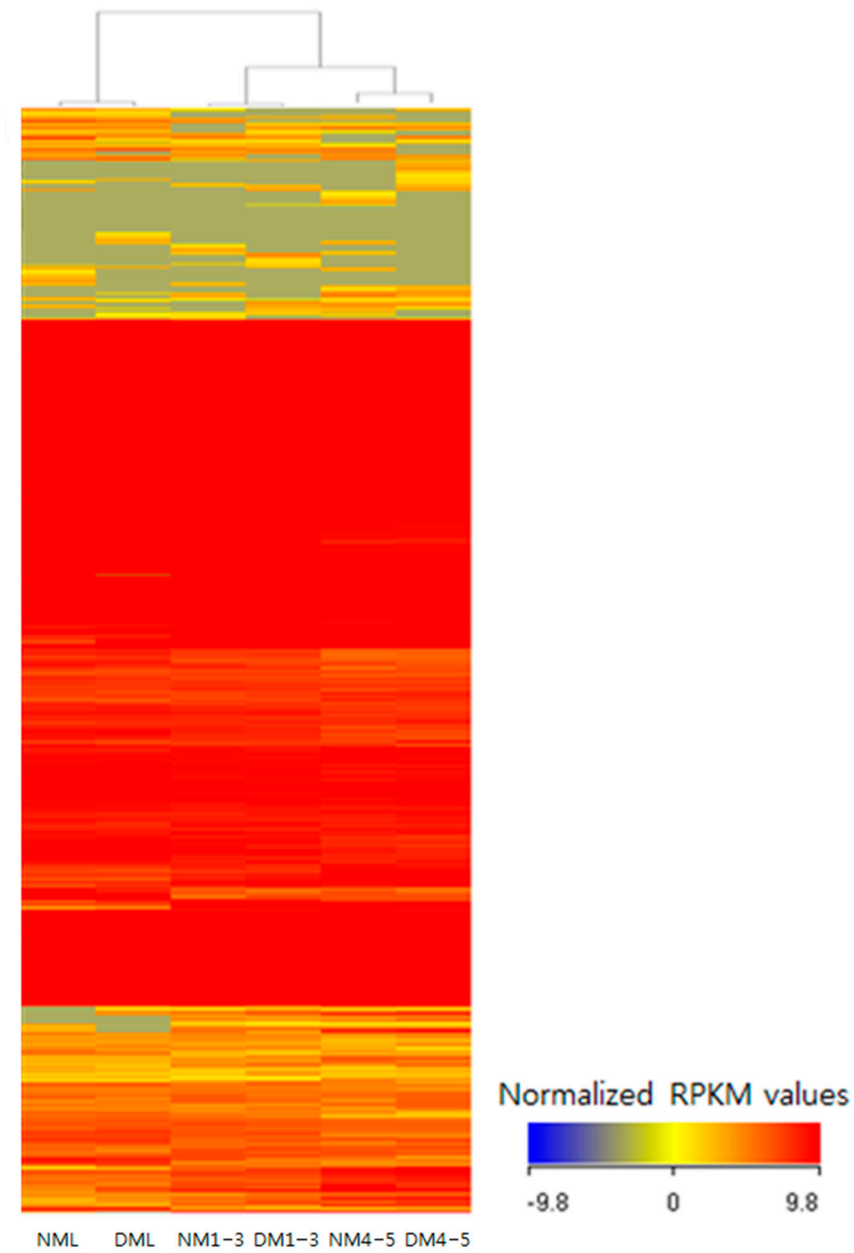

**Figure S2.** Hierarchical cluster of the expressed genes in the six libraries; NML (normal morph of late embryo), DML (defensive morph of late embryo), NM1-3 (normal morph of 1–3 instar), DM1-3 (defensive morph of 1–3 instar), NM4-5 (normal morph of 4–5 instar), and DM4-5 (defensive morph of 4–5 instar). Color changes from blue to red represent normalized RPKM values from low to high.

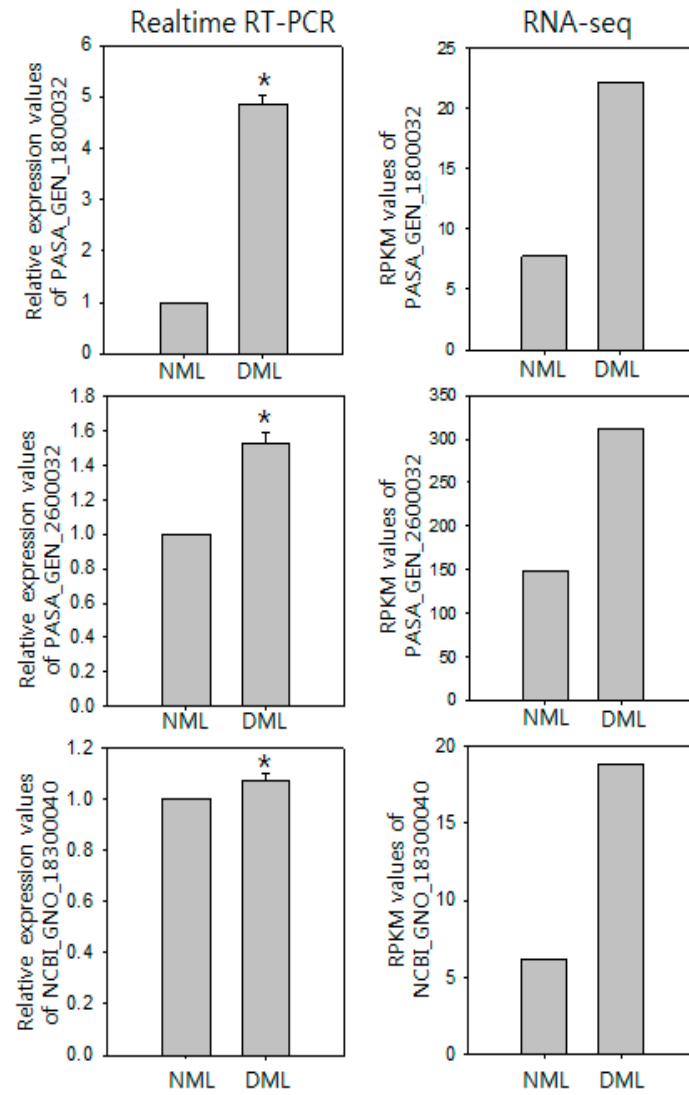

**Figure S3.** Real-time RT-PCR validation. \* represents differentially-expressed genes between normal morph (NM) and defensive morph (DM) with significance ( $p < 0.05$ ). NML and DML represent the normal morph of the late embryo and the defensive morph of the late embryo, respectively.

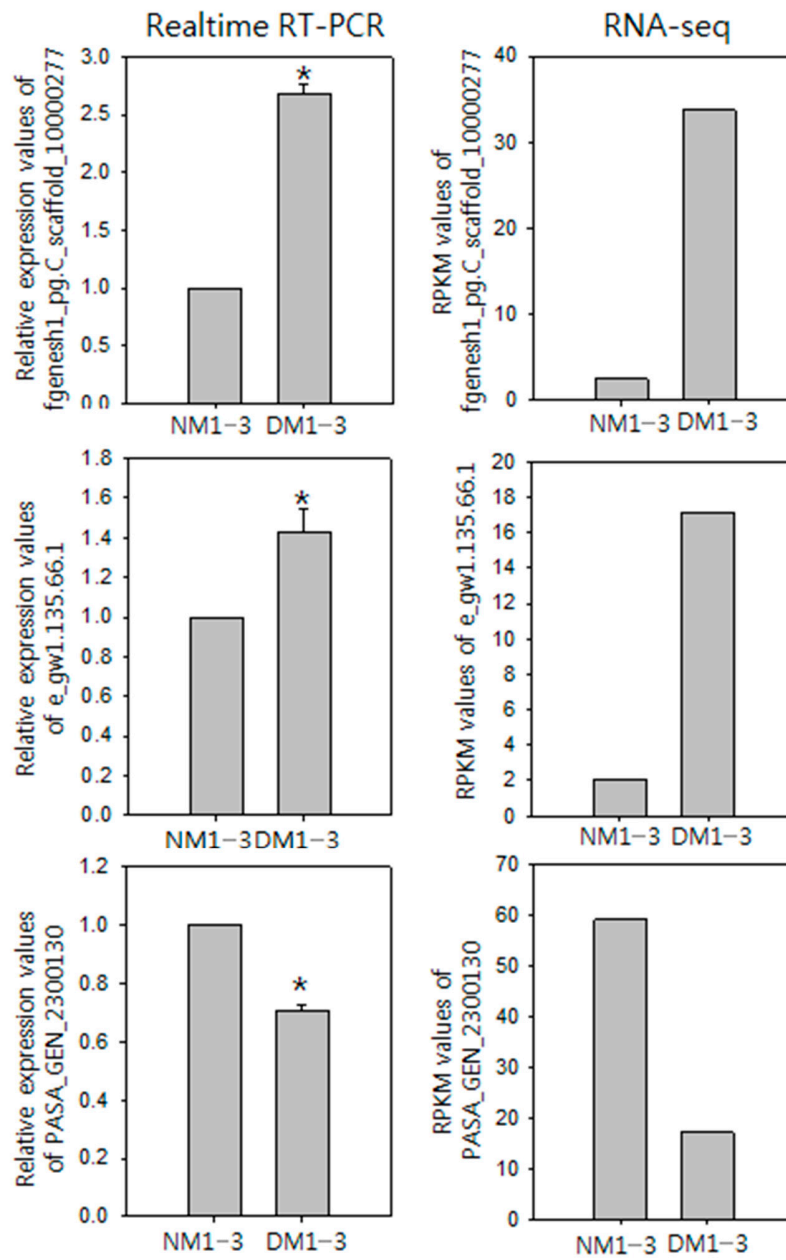

**Figure S3.** Real-time PCR validation. \* represents differentially-expressed genes between normal morph (NM) and defensive morph (DM) with significance ( $p < 0.05$ ). NM1-3 and DM1-3 represent the normal morph of 1-3 instar and the defensive morph of 1-3 instar, respectively.

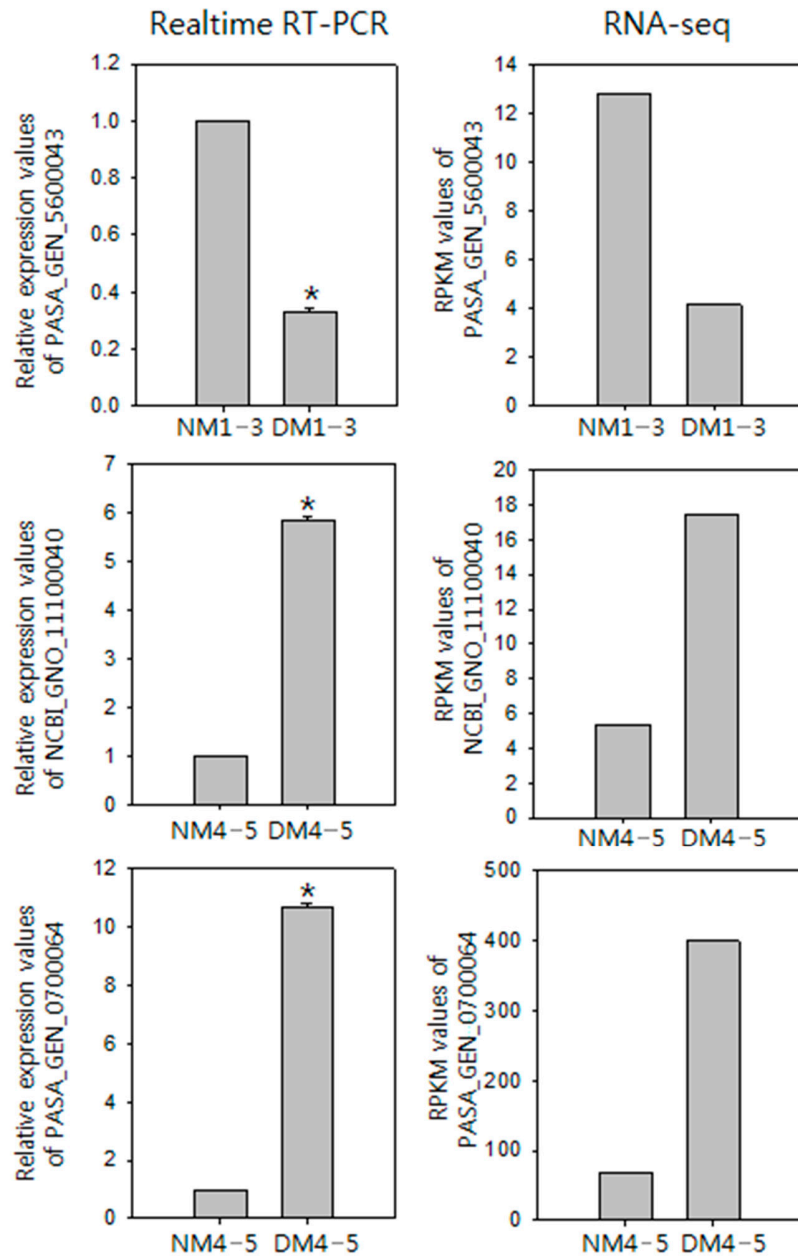

**Figure S3.** Real-time PCR validation. \* represents differentially-expressed genes between the normal morph (NM) and the defensive morph (DM) with significance ( $p < 0.05$ ). NM1-3, DM1-3, NM4-5, and DM4-5 represent the normal morph of 1-3 instar, defensive morph of 1-3 instar, normal morph of 4-5 instar, and defensive morph of 4-5 instar, respectively.

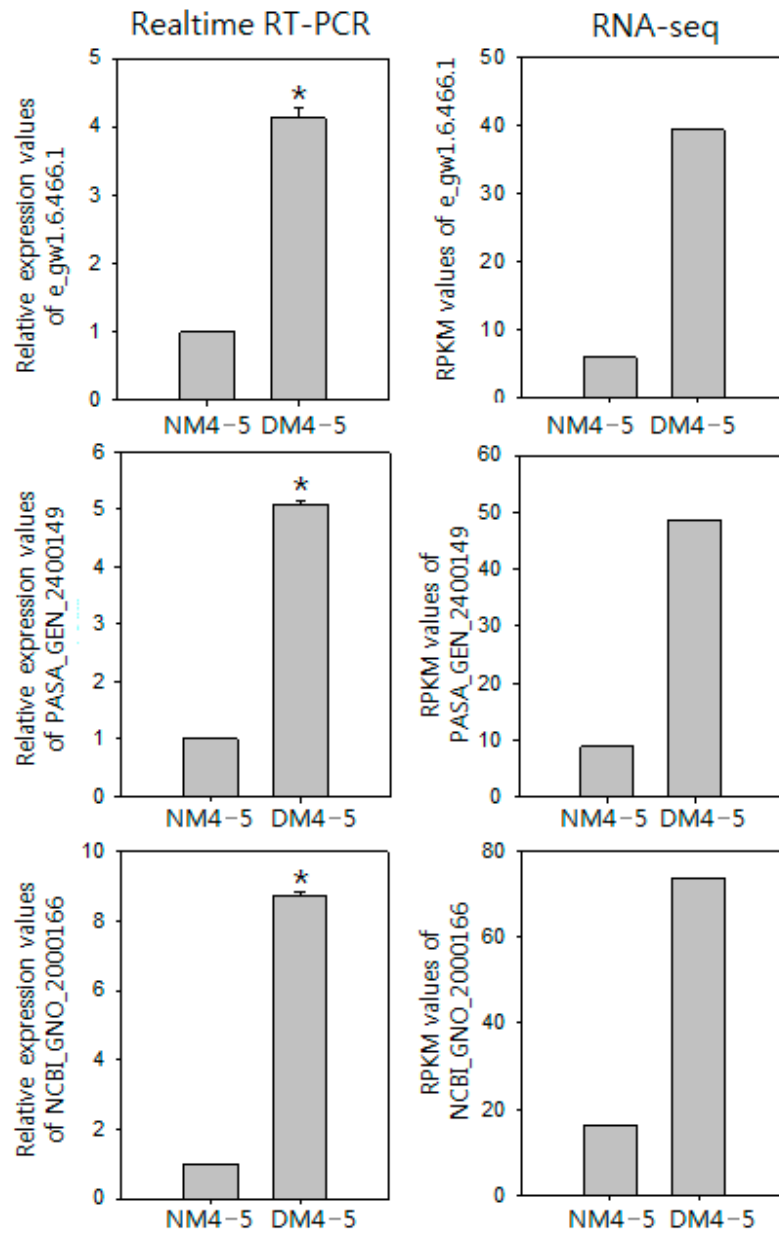

**Figure S3.** Real-time PCR validation. \* represents differentially-expressed genes between normal morph (NM) and defensive morph (DM) with significance ( $p < 0.05$ ). NM4-5 and DM4-5 represent the normal morph of 4–5 instar, and defensive morph of 4–5 instar, respectively.

**Table S1.** The List of the differently-expressed genes.

See Table S1.

**Table S2.** Differential expression of neurotransmitter receptors between normal and defensive morphs among developmental stages.

|                         | Gene ID                          | Late embryo | 1-3 instar | 4-5 instar | Descriptions                                                                        |
|-------------------------|----------------------------------|-------------|------------|------------|-------------------------------------------------------------------------------------|
| Peptide receptor        | e_gw1.91.62.1                    | Down        | -          | -          | Allatostatin receptor – <i>Periplaneta americana</i> **                             |
|                         | fgenes1_pg.C_scaffold_1416000002 | -           | -          | Up         | Allatostatin receptor – <i>Periplaneta americana</i> **                             |
|                         | gw1.142.6.1                      | -           | Down       | -          | Ecdysis triggering hormone receptor subtype B - <i>Aedes aegypti</i> **             |
|                         | gw1.8.84.1                       | -           | -          | Up         | AGAP005229-PA (Myosuppressin receptor) - <i>Anopheles gambiae</i> **                |
| Amine receptor          | e_gw1.93.6.1                     | -           | Down       | -          | Histamine-gated chloride channel subunit - <i>Culex quinquefasciatus</i> **         |
|                         | e_gw1.4.443.1                    | Up          | -          | -          | Octopamine receptor - <i>Apis mellifera</i> **                                      |
| Small molecule receptor | fgenes1_pg.C_scaffold_62000026   | -           | Up         | -          | Nicotinic acetylcholine receptor subunit alpha8 precursor - <i>Gallus gallus</i> ** |
|                         | e_gw1.76.84.1                    | -           | -          | Down       | Nicotinic acetylcholine receptor subunit alpha3 - <i>Bombyx mori</i> **             |
|                         | NCBI_GNO_1500242                 | -           | -          | Down       | Kainate receptor subunit GluR5 and related subunits*                                |
|                         | fgenes1_pg.C_scaffold_183000025  | -           | Down       | -          | Kainate receptor subunit GluR5 and related subunits*                                |
|                         | NCBI_GNO_8300009                 | -           | -          | Up         | Kainate receptor subunit GluR5 and related subunits*                                |
|                         | NCBI_GNO_1700146                 | -           | -          | Up         | Kainate receptor subunit GluR6 and related subunits*                                |

|                                 |      |      |    |                                                                       |
|---------------------------------|------|------|----|-----------------------------------------------------------------------|
| NCBI_GNO_2300006                | -    | Down | -  | Kainate receptor subunit GluR7 and related subunits*                  |
| NCBI_GNO_8900043                | Down | -    | -  | Kainate receptor subunit GluR8 and related subunits*                  |
| NCBI_GNO_0900239                | -    | -    | Up | Kainate receptor subunit GluR9 and related subunits*                  |
| NCBI_GNO_18700035               | -    | Up   | -  | Kainate receptor subunit GluR10 and related subunits*                 |
| NCBI_GNO_8300040                | -    | -    | Up | NMDA receptor subunit GluN1 and related subunits *                    |
| e_gw1.374.3.1                   | Up   | -    | -  | NMDA receptor subunit GluN2 and related subunits *                    |
| estExt_fgenes1_pg.C_1<br>130025 | -    | -    | Up | NMDA receptor subunit GluN2 and related subunits *                    |
| NCBI_GNO_3900088                | -    | Up   | -  | AMPA receptor subunit GluR2 and related subunits *                    |
| PASA_GEN_1700130                | -    | Down | -  | Metabotropic glutamate receptor subunit GRM2 and<br>related subunits* |

Descriptions of DEGs are referred from wFleaBase (\*), uniprot (\*\*).

**Table S3.** List of primers used for real-time PCR.

| Primers            | Sequence (5'-3')      | Descriptions                             |
|--------------------|-----------------------|------------------------------------------|
| GAPDH_F            | GGTGCTGCCAGAACATTAT   | Glyceraldehyde-3-phosphate dehydrogenase |
| GAPDH_R            | GACAGCCTTGATTTTCGTCGT |                                          |
| PASA_GEN_1800032_F | GAGCCATAGACGAGGTCTGC  | Insulin-like***                          |
| PASA_GEN_1800032_R | CAAGGACGACGACTGATTGA  |                                          |
| PASA_GEN_2600032_F | GTGGTGAAGACATGGACGTG  | Molecular chaperone (DnaJ superfamily)*  |
| PASA_GEN_2600032_R | CAATGGGCGGATCTTGACT   |                                          |



|                                  |                      |                                                                                          |
|----------------------------------|----------------------|------------------------------------------------------------------------------------------|
| NCBI_GNO_18300040_F              | GGTCTCCTCCTCATGTCCAA | Predicted lipoprotein*                                                                   |
| NCBI_GNO_18300040_R              | GACTGGATCAGCTTGTGGGT |                                                                                          |
| fgenes1_pg.C_scaffold_10000277_F | CAGCTCAGTTCAGACAAGCG | Calcium-responsive transcription coactivator*                                            |
| fgenes1_pg.C_scaffold_10000277_R | GGTCCTGCCATCTGATTCAT |                                                                                          |
| e_gw1.135.66.1_F                 | CTCCGTTTGCCGTTATGTTT | Na+/dicarboxylate. Na+/tricarboxylate and phosphate transporters*                        |
| e_gw1.135.66.1_R                 | GCTGCGTTTGAGGCTATTTC |                                                                                          |
| PASA_GEN_2300130_F               | AATGCTCGCGTTAATTGGAC | Permease of the major facilitator superfamily*                                           |
| PASA_GEN_2300130_R               | CAGCGGTCATTGCAGTTAGA |                                                                                          |
| PASA_GEN_5600043_F               | CTGGCATTTCCTTTGGATGT | Transcription factor BLIMP-1/PRDI-BF1. contains C2H2- type Zn-finger and SET domains*    |
| PASA_GEN_5600043_R               | ACCAGAATGGTGAGAAACGG |                                                                                          |
| NCBI_GNO_11100040_F              | GCTCAAGGCTGTGGAAGAAG | Monocarboxylate transporter*                                                             |
| NCBI_GNO_11100040_R              | AACCAAATGGACGTATGGGA |                                                                                          |
| sPASA_GEN_0700064_F              | AGAATCCCACGTCCAGTGTC | Peroxidase*                                                                              |
| PASA_GEN_0700064_R               | CGTTGGTGAGTAGCACGAGA |                                                                                          |
| e_gw1.6.466.1_F                  | CGGCTGTGAAATCAGTCTCA | Ankyrin repeat*                                                                          |
| e_gw1.6.466.1_R                  | TGAGGATTTCTGCAGGCTTT |                                                                                          |
| PASA_GEN_2400149_F               | ATTGTGATGAGCACAGCAG  | Low-density lipoprotein receptors containing Ca <sup>2+</sup> -binding EGF-like domains* |
| PASA_GEN_2400149_R               | CATCAACTGAACGCTGAGGA |                                                                                          |
| NCBI_GNO_2000166_F               | ATGCTGTCACAGGAGAGGCT | ATP-dependent RNA helicase*                                                              |
| NCBI_GNO_2000166_R               | TTCAGATGCGATAAGCGATG |                                                                                          |

---

Descriptions of DEGs are referred from wFleaBase (\*), uniprot (\*\*), interpro (\*\*\*)).
